# Supplementary material for: Discovery of a Ni-Ga catalyst for carbon dioxide reduction to methanol
Source: Springer Nature journal article supplement (doi:10.1038/nchem.1873), 2014-02-28
Supplement: 41557_2014_BFnchem1873_MOESM173_ESM.pdf [file 41557_2014_BFnchem1873_MOESM173_ESM.pdf]

**Discovery of a Ni-Ga catalyst for carbon dioxide reduction to methanol**

Felix Studt,<sup>1</sup> Irek Sharafutdinov,<sup>2</sup> Frank Abild-Pedersen,<sup>1</sup> Christian F. Elkjær,<sup>2</sup>  
Jens S. Hummelshøj,<sup>1</sup> Søren Dahl,<sup>2</sup> Ib Chorkendorff,<sup>2</sup> and Jens K. Nørskov<sup>1,3\*</sup>

*1 SUNCAT Center for Interface Science and Catalysis, SLAC National Accelerator Laboratory, 2575 Sand Hill Road, Menlo Park, CA 94025 (USA)*

*2 Center for Individual Nanoparticle Functionality (CINF), Department of Physics, Building 307 Technical University of Denmark, DK-2800 Lyngby, Denmark*

*3 SUNCAT Center for Interface Science and Catalysis, Department of Chemical Engineering, Stanford University, Stanford, CA 94305 (USA)*

*Energies of adsorbates and transition states:*

Table S1. RPBE adsorption energies of intermediates without and with zero point energy correction. Corrections are based on vibrational calculations on the Cu(211) surface alone. All energies are shown in eV and given relative to CH<sub>4</sub>, H<sub>2</sub>O and H<sub>2</sub> in the gas phase.

| Uncorr.              | Surface* |         |         |         |         |
|----------------------|----------|---------|---------|---------|---------|
| Adsorbate            | Ag(211)  | Cu(211) | Pd(211) | Pt(211) | Rh(211) |
| H*                   | 0.31     | -0.12   | -0.34   | -0.54   | -0.44   |
| O*                   | 1.92     | 1.03    | 1.54    | 1.30    | 0.20    |
| OH*                  | 0.57     | 0.12    | 0.69    | 0.30    | -0.26   |
| HCOO*                | 2.02     | 1.57    | 1.99    | 1.85    | 1.17    |
| HCOOH*               | 2.60**   |         |         |         |         |
| H <sub>2</sub> COOH* | 2.51     | 2.01    | 2.37    | 2.62    | 2.06    |
| H <sub>2</sub> CO*   | 2.40     | 2.35    | 1.92    | 1.77    | 1.43    |
| H <sub>3</sub> CO*   | 1.89     | 1.34    | 1.72    | 1.53    | 1.04    |

| ZPE corr.            | Surface |         |         |         |         |
|----------------------|---------|---------|---------|---------|---------|
| Adsorbate            | Ag(211) | Cu(211) | Pd(211) | Pt(211) | Rh(211) |
| H*                   | 0.34    | -0.09   | -0.31   | -0.51   | -0.41   |
| O*                   | 1.70    | 0.81    | 1.32    | 1.08    | -0.02   |
| OH*                  | 0.50    | 0.05    | 0.62    | 0.23    | -0.33   |
| HCOO*                | 1.29    | 0.84    | 1.26    | 1.12    | 0.44    |
| HCOOH*               | 2.01**  |         |         |         |         |
| H <sub>2</sub> COOH* | 2.12    | 1.62    | 1.98    | 2.23    | 1.67    |
| H <sub>2</sub> CO*   | 1.75    | 1.70    | 1.27    | 1.12    | 0.78    |
| H <sub>3</sub> CO*   | 1.64    | 1.09    | 1.47    | 1.28    | 0.79    |

\*Similar data for some intermediates can found in the CatApp.[1] That data was obtained on a slightly different surface and slightly different computational setup thus deviating slightly from the energies presented here. \*\*The HCOOH adsorption energy is zero for all surfaces when calculated with the RPBE functional.

Table S2. RPBE transition state energies without and with zero point energy correction. Corrections are based on vibrational calculations on the Cu(211) surface alone. All energies are shown in eV and given relative to CH<sub>4</sub>, H<sub>2</sub>O and H<sub>2</sub> in the gas phase.

| Uncorr.              | Surface* |         |         |         |         |
|----------------------|----------|---------|---------|---------|---------|
| Transition state     | Ag(211)  | Cu(211) | Pd(211) | Pt(211) | Rh(211) |
| H-H                  | 1.40     | 0.74    | 0.00    |         | 0.00    |
| H-COO                | 3.47     | 2.89    | 2.99    | 2.87    | 2.63    |
| HCOO-H               | 2.89     | 2.76    | 2.76    | 2.63    | 1.46    |
| H-HCOOH              | 3.56     | 2.87    | 2.59    | 2.78    | 2.93    |
| H <sub>2</sub> CO-OH | 2.97     | 2.08    | 2.60    | 2.07    | 1.18    |
| H-H <sub>2</sub> CO  | 3.07     | 2.56    | 2.40    | 2.15    | 1.72    |
| H <sub>3</sub> CO-H  | 2.98     | 2.03    | 2.41    | 2.12    | 1.85    |
| HO-H                 | 1.75     | 0.82    | 1.20    | 0.95    | 0.63    |

| ZPE corr.            | Surface* |         |         |         |         |
|----------------------|----------|---------|---------|---------|---------|
| Transition state     | Ag(211)  | Cu(211) | Pd(211) | Pt(211) | Rh(211) |
| H-H                  | 1.40     | 0.74    | 0.00    |         | 0.00    |
| H-COO                | 2.51     | 1.93    | 2.03    | 1.91    | 1.67    |
| HCOO-H               | 2.10     | 1.97    | 1.97    | 1.84    | 0.67    |
| H-HCOOH              | 2.99     | 2.30    | 2.02    | 2.21    | 2.36    |
| H <sub>2</sub> CO-OH | 2.49     | 1.60    | 2.12    | 1.59    | 0.70    |
| H-H <sub>2</sub> CO  | 2.62     | 2.11    | 1.95    | 1.70    | 1.27    |
| H <sub>3</sub> CO-H  | 2.69     | 1.74    | 2.12    | 1.83    | 1.56    |
| HO-H                 | 1.65     | 0.72    | 1.10    | 0.85    | 0.53    |

\*Similar data for some intermediates can found in the CatApp.[1] That data was obtained on a slightly different surface and slightly different computational setup thus deviating slightly from the energies presented here.

## Scaling relations

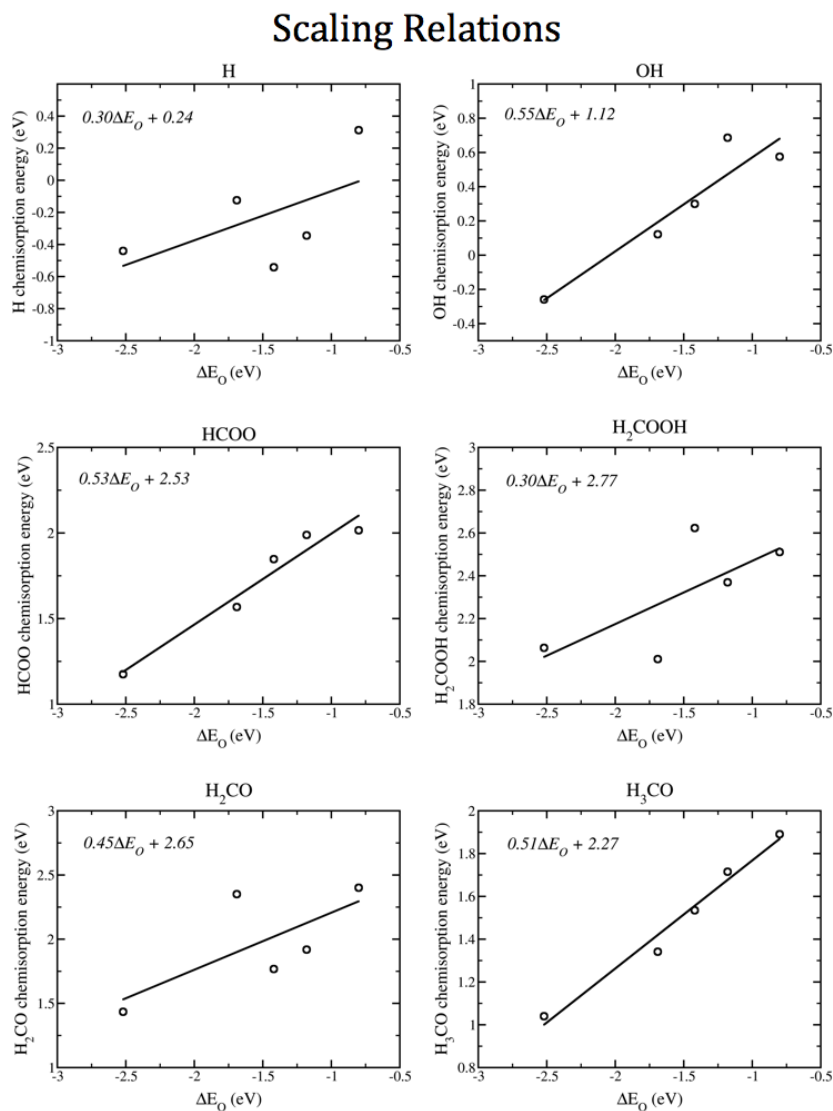

Figure S1. Scaling relations for all adsorbates as a function of  $\Delta E_0$ . All energies are relative to  $\text{CH}_4$ ,  $\text{H}_2\text{O}$  and  $\text{H}_2$  in the gas-phase.

## Transition state scaling relations

## Transition State Scaling Relations

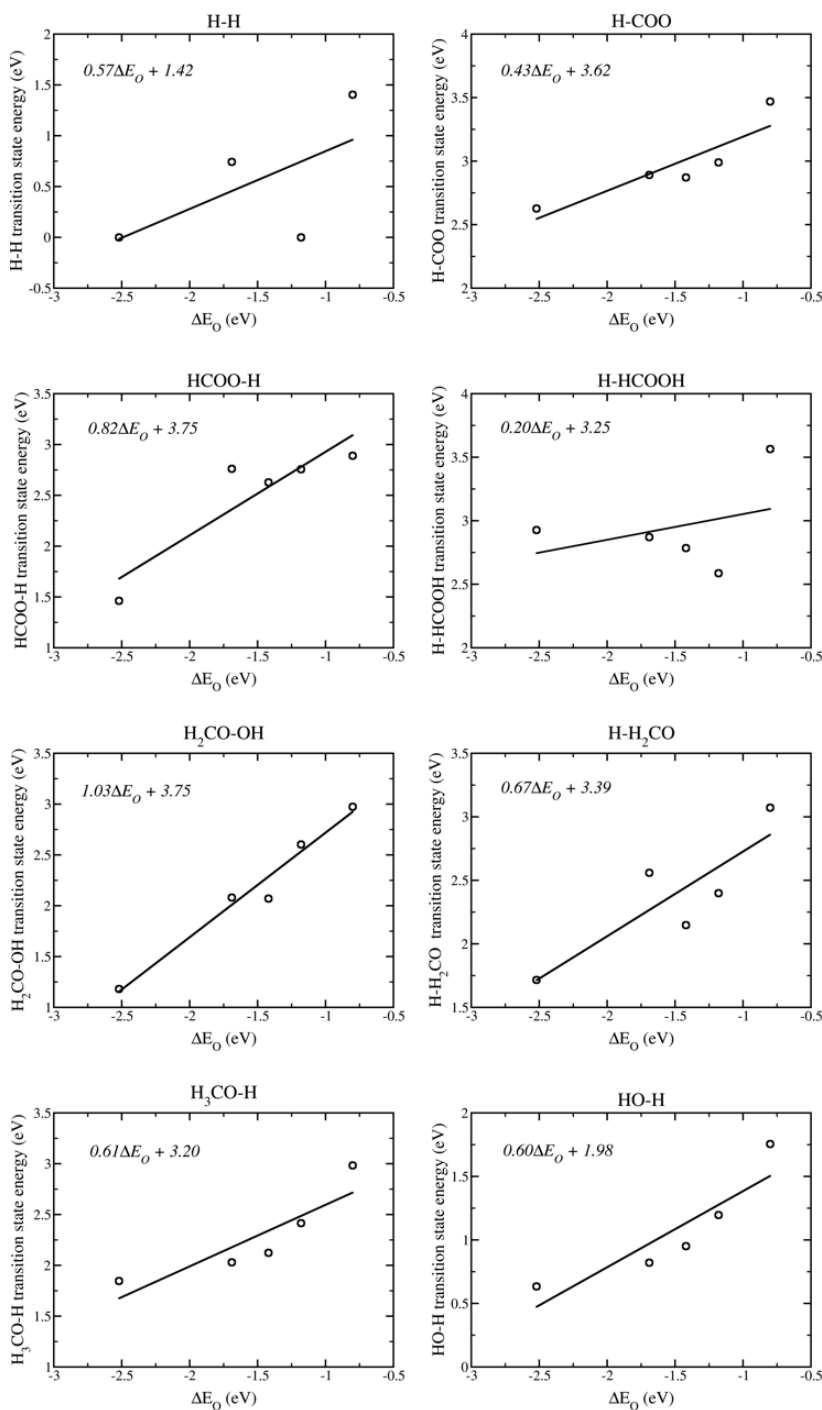

Figure S2. Scaling relations for all transition-states as a function of  $\Delta E_0$ . All energies are relative to  $\text{CH}_4$ ,  $\text{H}_2\text{O}$  and  $\text{H}_2$  in the gas-phase.

*Calculations of active surface area:*

Estimation of the active surface area was done based on the results from XRD and TEM investigations. The corresponding data is summarized in table S3 below:

Table S3

| catalyst                                          | particle size, TEM<br>nm | particle size, XRD,<br>nm | metal surface<br>area, TEM,<br>m <sup>2</sup> | metal surface<br>area, XRD,<br>m <sup>2</sup> |
|---------------------------------------------------|--------------------------|---------------------------|-----------------------------------------------|-----------------------------------------------|
| NiGa/SiO <sub>2</sub>                             | 6.2                      | 7.1                       | 8.9                                           | 7.6                                           |
| Ni <sub>5</sub> Ga <sub>3</sub> /SiO <sub>2</sub> | 5.1                      | 5.9                       | 10.6                                          | 9.2                                           |
| Ni <sub>3</sub> Ga/SiO <sub>2</sub>               | N/A                      | 4.8                       | N/A                                           | 10.9                                          |
| Cu/ZnO/Al <sub>2</sub> O <sub>3</sub>             | N/A                      | 5.7                       | N/A                                           | 9.5                                           |

For each diffractogram presented in figure 2, the FWHM (full width at half maximum) values of the most intense diffraction peak was used to calculate the average crystallite size, according to the Scherrer equation. Average TEM particle size was derived by statistical treatment of 219 and 168 particles in case of Ni<sub>5</sub>Ga<sub>3</sub> and NiGa, respectively. Note that the values of active surface area for the two most active catalysts, namely Ni<sub>5</sub>Ga<sub>3</sub>/SiO<sub>2</sub> and Cu/ZnO/Al<sub>2</sub>O<sub>3</sub> are similar, implying that their turnover frequency values are also comparable.

*Reverse Water-Gas-Shift volcano*

In an attempt to understand the differences in methanol/CO selectivity we constructed a rWGS activity volcano, which is shown in Figure S3. The volcano is constructed assuming  $\Delta E_0$  to be fixed at the value found at the top of the methanol volcano, leaving  $\Delta E_{CO}$  as the only parameter. The surface structures of NiGa and Ni<sub>5</sub>Ga<sub>3</sub> exhibit both a Ni rich and a Ga rich step site. Importantly, the CO adsorption energy on the Ni rich steps on both, NiGa and Ni<sub>5</sub>Ga<sub>3</sub> is -1.67 and -1.60 eV, respectively, close to that found for pure Ni.[3]. We rationalize that these sites will hence be blocked by CO under reaction conditions. Methane formation via splitting of CO is also possible although at rather low rates. This will form carbonaceous species which in turn will poison the surface. Assuming that CO<sub>2</sub> hydrogenation proceeds at a different site (namely the Ga site where  $\Delta E_0$  is close to that of Cu, see Figure 1) one could imagine that the sites responsible for rWGS and methanation are either blocked by CO or deactivated by carbon deposition whereas this effect will be much smaller for the methanol formation sites resulting in a high methanol selectivity.

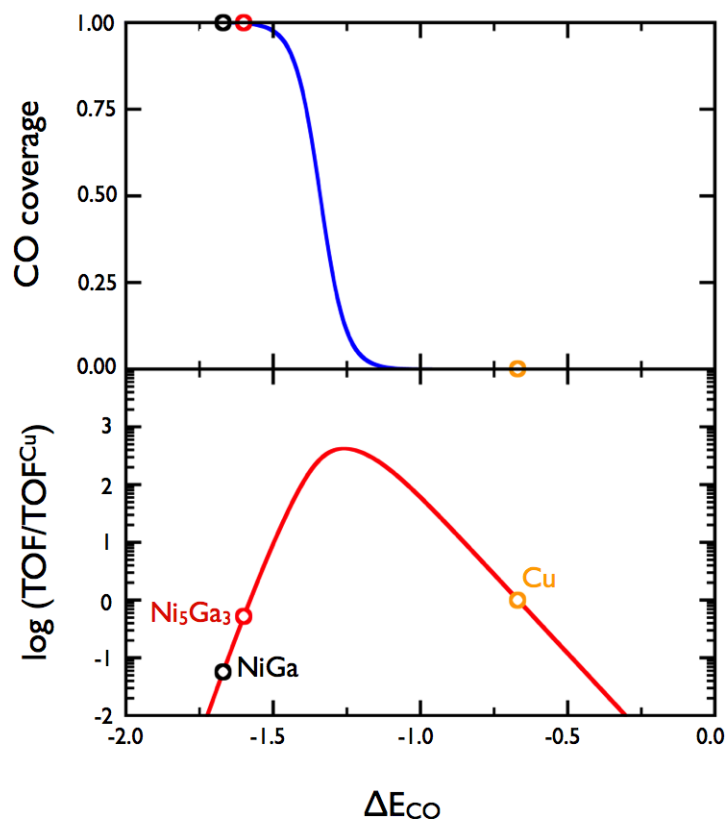

Figure S3. CO coverage (top) and rWGS activity (bottom) as a function of  $\Delta E_{\text{CO}}$ . CO adsorption energies on stepped Cu, the Ni step in NiGa and the Ni step in Ni<sub>5</sub>Ga<sub>3</sub> are depicted. Reaction conditions are: 500 K, 0.245 bar CO<sub>2</sub>, 0.745 bar H<sub>2</sub>, 0.005 bar CO and 0.005 bar H<sub>2</sub>O.

#### *Methane detection upon regeneration of the catalyst in H<sub>2</sub>*

Upon heating in hydrogen 0.0000235 mol of CH<sub>4</sub> were released which we calculated (using an average surface diameter of 5.1 nm) to be correlated to poisoning of ~ 10 % of the surface area of the catalyst. This is assuming uniform spherical Ni<sub>5</sub>Ga<sub>3</sub> nanoparticles, with surface composition corresponding to that of the bulk. This is consistent with poisoning of surface step sites and we therefore suggest that catalysts deactivation occurs via carbon deposition on steps

*Adsorption of CO and O on Ni<sub>5</sub>Ga<sub>3</sub>, Ni<sub>3</sub>Ga, and NiGa***Ni<sub>5</sub>Ga<sub>3</sub>**

We calculated adsorption of CO and O on Ni<sub>5</sub>Ga<sub>3</sub> in the experimentally found crystal structure (space group).[4] Further information about the structure of Ni<sub>5</sub>Ga<sub>3</sub> can be found at: <https://materialsproject.org/materials/mp-11398/>). In order to simulate adsorption on a stepped surface we cut the crystal in the (111) direction. CO and oxygen adsorption were calculated trying 10 and 6 different adsorption sites on the (111) steps, respectively. CO was found to bind most strongly at the pure Ni step (-1.6 eV). Oxygen binds most strongly at the mixed Ni-Ga step (-2.3 eV) (see Figure S4).

The DFT calculations on the Ni<sub>5</sub>Ga<sub>3</sub> systems were performed using Dacapo with the RPBE functional. The Brillouin zone was sampled on a (4x4x1) grid and the kinetic energy and density cutoffs were 340 Ry and 500 Ry respectively. The slab model included 6 formula units of Ni<sub>5</sub>Ga<sub>3</sub> which corresponded to a slab thickness of ~8 Å or ~6 atomic layers, with the bottom ~2.5 atomic layers kept at their symmetric positions. The adsorbent coverage on the step was 1/2.

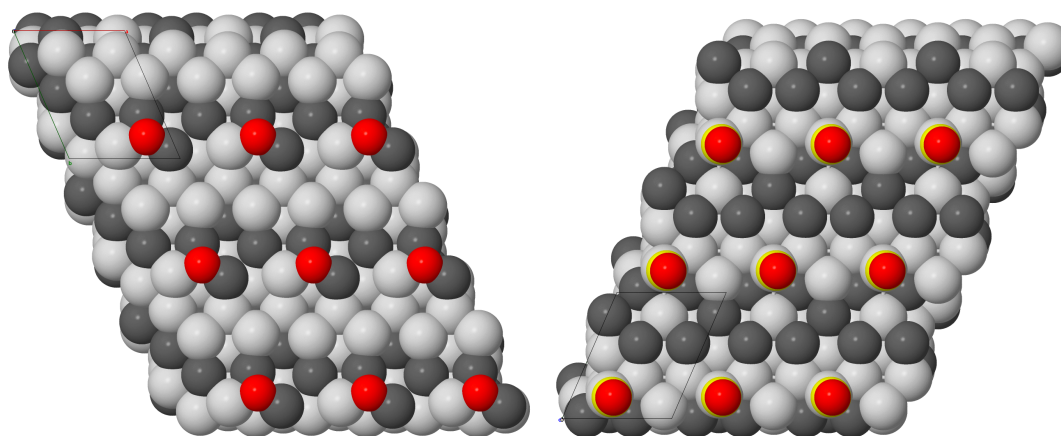

*Figure S4. Adsorption of O and CO at the stepped facet of Ni<sub>5</sub>Ga<sub>3</sub> (colors: Ni: dark-grey; Ga: light-grey; O: red; C: yellow). Four types of steps can form on this facet and all are represented on the figures: two types of pure Ni steps, one pure Ga and one mixed Ni-Ga. (left) O binds most strongly by -2.3eV on the mixed step (right) CO binds most strongly on the pure Ni step shown by -1.6eV.*



## NiGa

In order to simulate adsorption on a stepped surface of NiGa (which has a bcc structure) we cut the crystal in the (121) direction resulting in the formation of a Ni-Ni and a Ga-Ga step (see Figure S5). CO and oxygen adsorption were calculated trying 4 different adsorption sites on both steps. The calculational setup was the same as for Ni<sub>5</sub>Ga<sub>3</sub> but with a density cutoff of 680 Ry and a vacuum distance of approximately 12 Å.

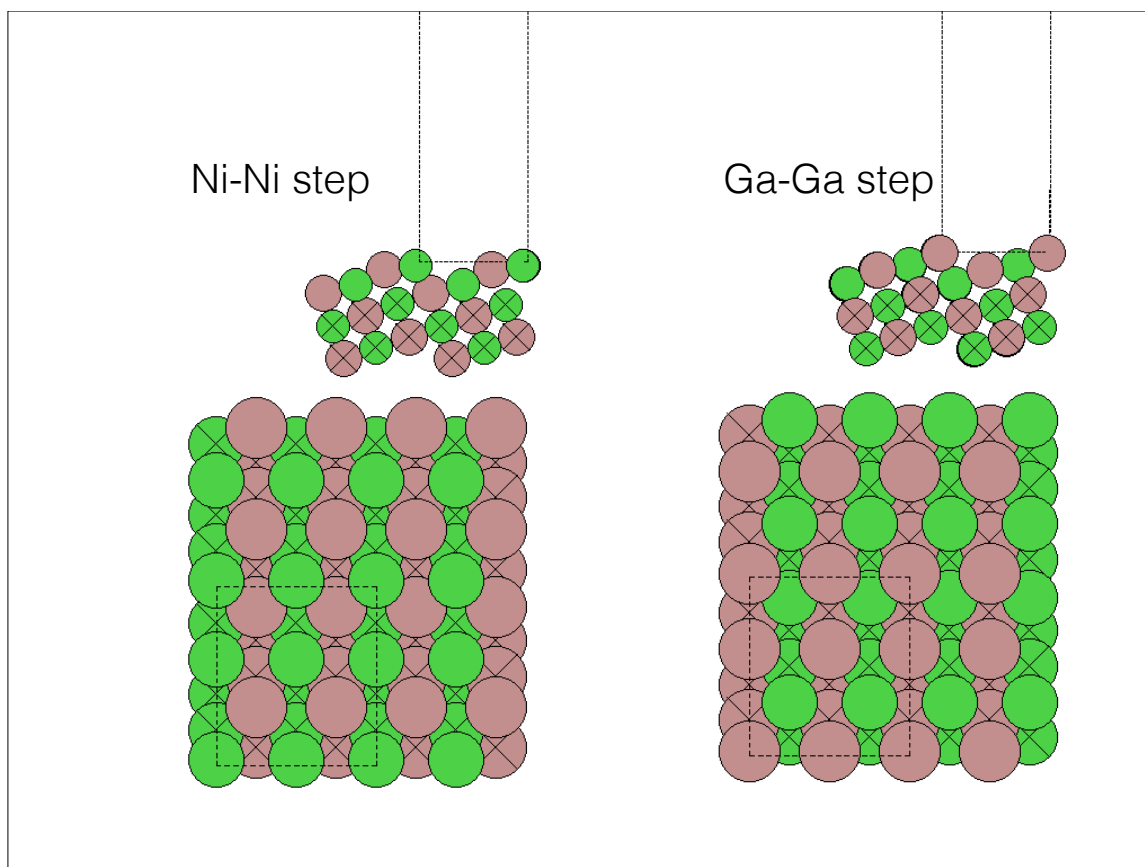

Figure S5. The Ni-Ni and Ga-Ga steps of NiGa (colors: Ni: green; Ga: brown). Two types of steps can form on this facet as represented in the figures: a pure Ni step, and a pure Ga step. The steps are shown from a side view (top) and an ontop view (bottom). The dashed line indicates the unit cell used for the calculations.

### Ni<sub>3</sub>Ga

In order to simulate adsorption on a stepped surface (which has an fcc structure) we cut the crystal in the (211) direction resulting in the formation of a Ni-Ni and a Ni-Ga step (see Figure S6). Oxygen adsorption was calculated trying 7 and 4 different adsorption sites on the (211) steps, respectively. The calculational setup was the same as for Ni<sub>5</sub>Ga<sub>3</sub> but with a density cutoff of 680 Ry and a vacuum distance of 10 Å.

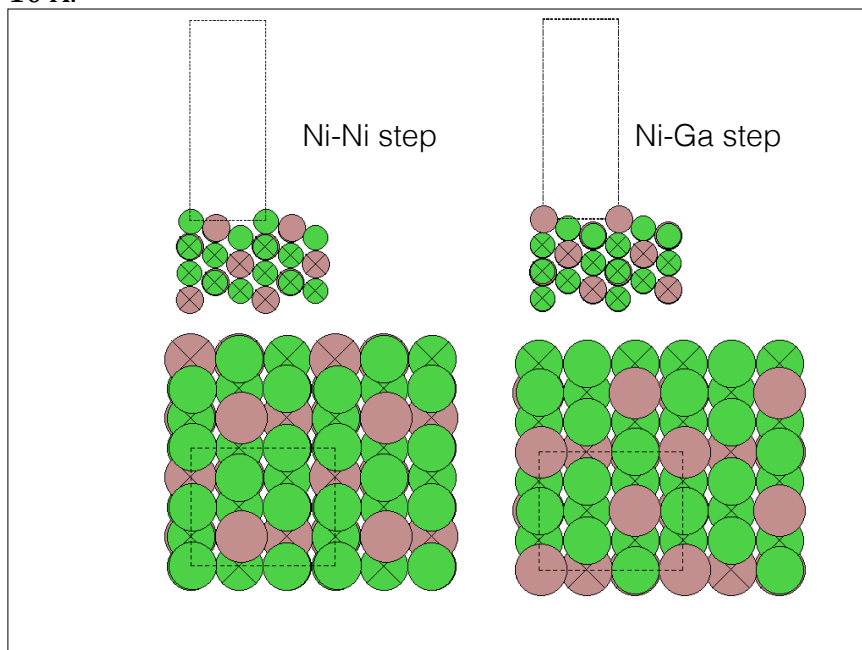

*Figure S6. The Ni-Ni and Ni-Ga steps of Ni<sub>3</sub>Ga (colors: Ni: green; Ga: brown). Two types of steps can form on this facet as represented in the figures: a pure Ni step, and a mixed Ni-Ga step. The steps are shown from a side view (top) and an ontop view (bottom). The dashed line indicates the unit cell used for the calculations.*

*Reference XRD data*

Figure S7 displays the reference XRD data for  $\text{Ni}_3\text{Ga}$ ,<sup>[6]</sup>  $\text{Ni}_5\text{Ga}_3$ ,<sup>[7]</sup> and  $\text{NiGa}$ .<sup>[8]</sup>

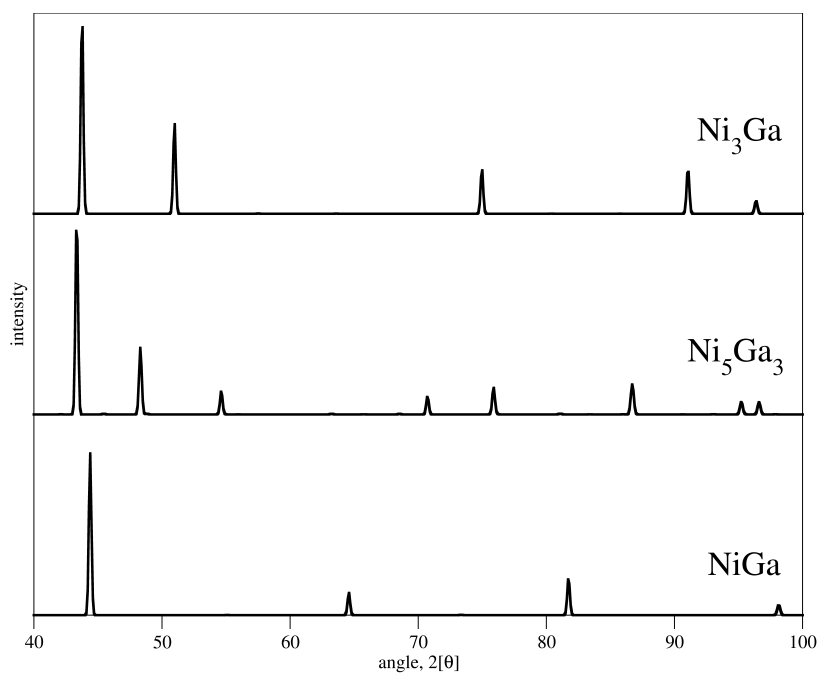

Figure S7. Reference XRD data for  $\text{Ni}_3\text{Ga}$ ,  $\text{Ni}_5\text{Ga}_3$  and  $\text{NiGa}$ . Data from refs 6-8.

*Error bar estimation for Figure 3*

For all compounds detected, the representative peak area values recorded by the Gas Chromatograph (GC) at each temperature are measured 5 times by means of manual integration. Based the results of these measurements, the corresponding standard deviation values (error bars) are calculated. Then, when necessary, the standard deviation values are multiplied or divided to get the error bars of the selectivities or CO/CH<sub>3</sub>OH ratios, using the following equations:

$$\underline{dz} = (x/y) * (\underline{dx}/x + \underline{dy}/y) \quad \text{or} \quad \underline{dz} = \underline{dx} * xy$$

where:

- **dz** is the resulting error bar
- **dx** and **dy** are the individual error bars
- **x** and **y** are the values recorded by the Gas Chromatograph or calculated selectivities

Therefore, the error bars are reflecting the *intrinsic accuracy of the quantification by the GC*, but *not* the scatter of *N* data points collected and averaged at a certain temperature.

The error bars associated with CH<sub>3</sub>OH signal and the calculated selectivities (figures 3a and 3b, respectively) appear to be 2-3 orders of magnitude smaller than the corresponding values and are therefore not shown in figures 3a and 3b. The error bars of the CO/CH<sub>3</sub>OH ratio (figure 3c) are somewhat larger. Since the data is shown on a logarithmic plot, however, the error bars are smaller than the corresponding data points and are therefore not shown in the figure but can be found in table S4.

| Ni <sub>5</sub> Ga <sub>3</sub> /SiO <sub>2</sub> | Temperature in C |       |       |       |       |       |       |
|---------------------------------------------------|------------------|-------|-------|-------|-------|-------|-------|
|                                                   | 168              | 183   | 198   | 213   | 223   | 233   | 249   |
| CO/MeOH ratio                                     | 0.845            | 1.10  | 1.23  | 1.94  | 2.61  | 4.97  | 15.0  |
| Error bar                                         | 0.236            | 0.140 | 0.106 | 0.100 | 0.119 | 0.163 | 0.375 |

| Cu/ZnO/Al <sub>2</sub> O <sub>3</sub> | Temperature in C |       |       |       |       |
|---------------------------------------|------------------|-------|-------|-------|-------|
|                                       | 189              | 204   | 219   | 233   | 248   |
| CO/MeOH ratio                         | 1.36             | 2.81  | 7.71  | 34.8  | 225   |
| Error bar                             | 0.117            | 0.099 | 0.123 | 0.278 | 0.979 |

## References

- [1] Hummelshøj, J. S., Abild-Pedersen, F., Studt, F., Bligaard, T., Nørskov, J. K. CatApp: A Web Application for Surface Chemistry and Heterogeneous Catalysis. *Angew. Chem. Int. Ed.* **51**, 272-274 (2012).
- [2] Baltes, C., Vukojević, S. & Schüth, F. Correlations between synthesis, precursor, and catalyst structure and activity of a large set of CuO/ZnO/Al<sub>2</sub>O<sub>3</sub> catalysts for methanol synthesis. *J. Catal.* **258**, 334-344 (2008).
- [3] Andersson, M. P., Abild-Pedersen, F., Remediakis, I. N., Bligaard, T., Jones, G., Engbæk, J., Lytken, O., Horch, S., Nielsen, J. H., Sehested, J., Rostrup-Nielsen, J. R., Nørskov, J. K. & Chorkendorff, I. Structure sensitivity of the methanation reaction: H<sub>2</sub>-induced CO dissociation on nickel surfaces. *J. Catal.* **255**, 6-19 (2008).
- [4] Jain, A., Hautier, G., Moore, C., Ong, S. P., Fischer, C., Mueller, T., Persson, K., Ceder, G. A high-throughput infrastructure for density functional theory calculations. *Comput. Mater. Sci.* **50**, 2295-2310 (2011).
- [5] Ong, S. P., Jain, A., Hautier, G., Kocher, M., Cholia, S., Gunter, D., Bailey, D., Skinner, D., Persson, K., Ceder, G. *The Materials Project*. <http://materialsproject.org/>
- [6] Mishima, Y., Ochiai, S. & Suzuki, T. Lattice parameters of Ni( $\gamma$ ), Ni<sub>3</sub>Al( $\gamma'$ ) and Ni<sub>3</sub>Ga( $\gamma'$ ) solid solutions with additions of transition and B-subgroup elements. *Acta Metall.* **33**, 1161-1169 (1985).
- [7] Bhan, S. & Schubert, K. Über die Struktur von Phasen mit Kupfer Unterstruktur in einigen T-B Legierungen (T=Ni, Pd, Pt; B=Ga, In, Tl, Pb, Sb, Bi). *J. Less-Common Metals* **17**, 73-90 (1969).
- [8] Guérin, R. & Guivarc'h, A. Metallurgical study of Ni/GaAs contacts. I. Experimental determination of the solid portion of the NiGaAs ternary phase diagram. *J. Appl. Phys.* **66**, 2122-2128 (1989).
